# Supplementary material for: Optimization of magnetic bead-based nucleic acid extraction for SARS-CoV-2 testing using readily available reagents
Source: bioRxiv or medRxiv preprint supplement (doi:10.1101/2021.03.09.21251364), 2021-03-13

**A**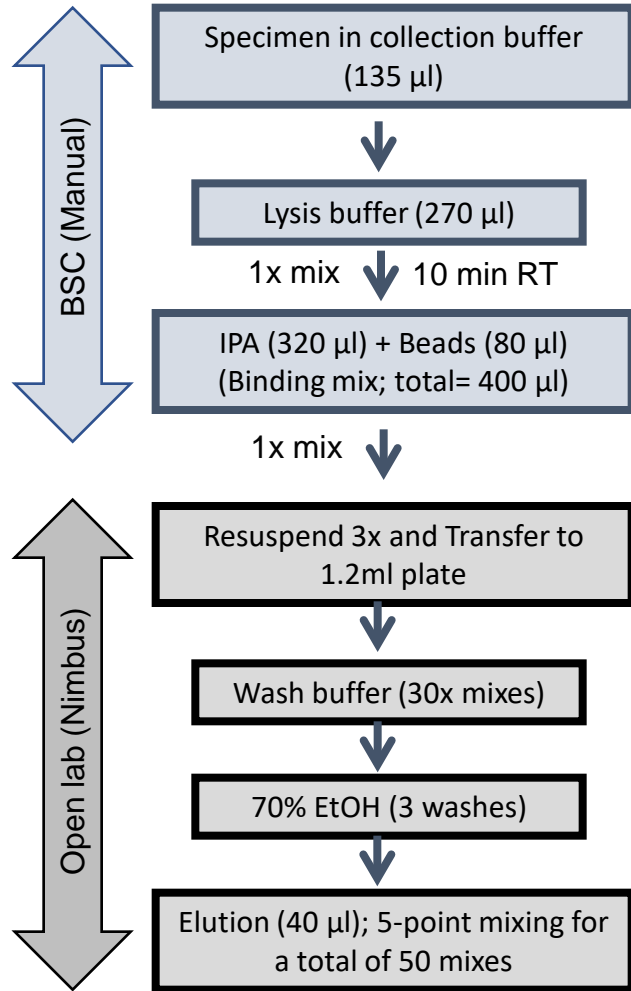**B**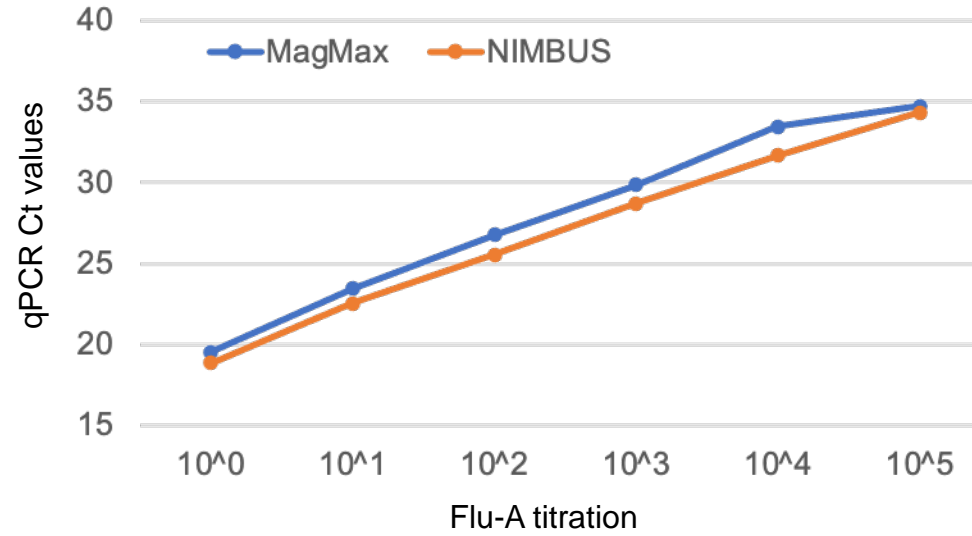**C**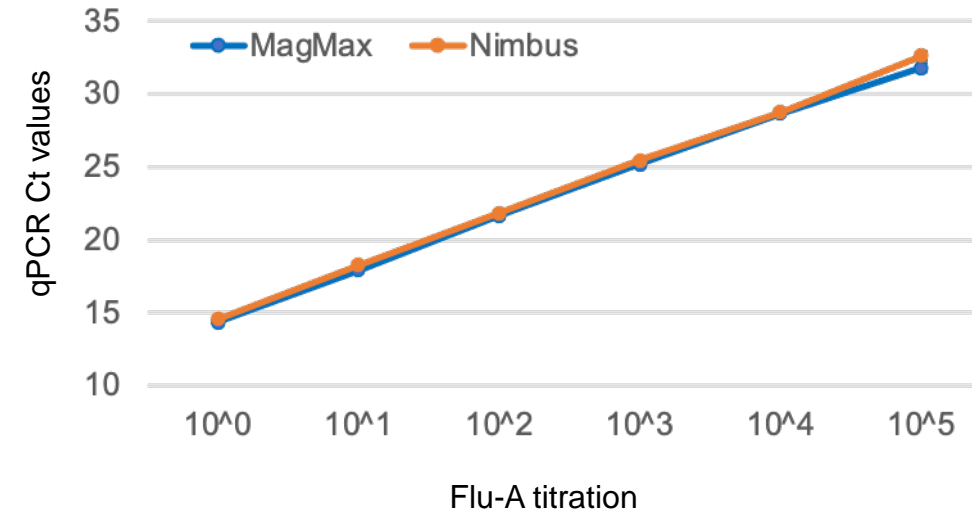

## Iteration-2

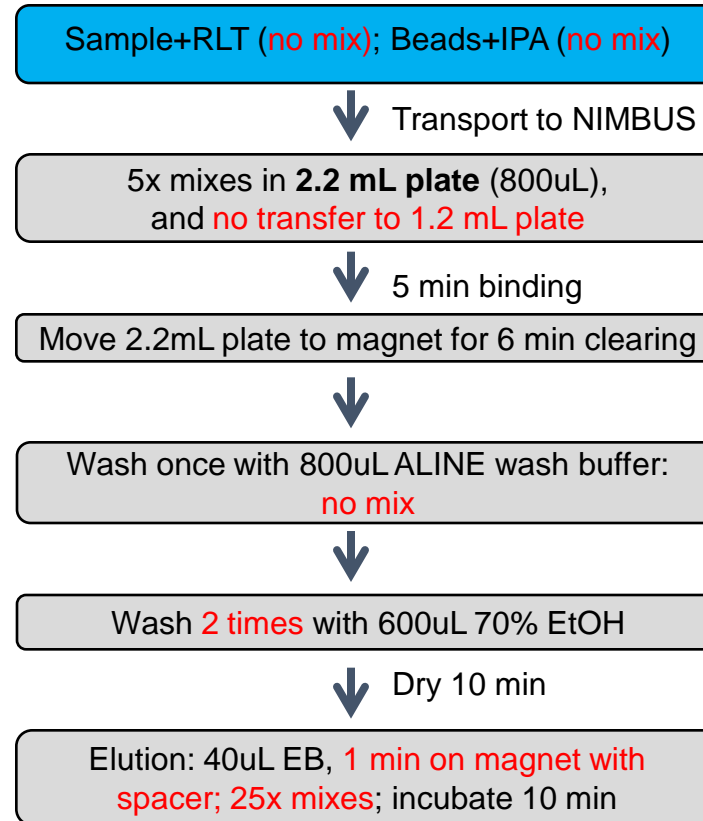

| Step                | Sub-Step                                            | Iteration-1          | Iteration-2                  | Remark                                                                                                           |
|---------------------|-----------------------------------------------------|----------------------|------------------------------|------------------------------------------------------------------------------------------------------------------|
| Bead-sample mixture | Liquid Class                                        | DfFS                 | Jet dispense (JetNoBO)       | Jet dispense allows higher dispense speed than aspirate speed, which results in better clearing after mixing     |
|                     | Pause to clear tips after mix                       | No                   | Yes (2min)                   | Allows residual liquid from the surface area for the 1ml tips with 800 µL volume to settle to bottom of the tips |
|                     | Clearing time on magnet                             | 6 min                | 10 min                       |                                                                                                                  |
|                     | Aspirate supernatant off plate on magnet            | Static               | Moving aspirate (dllCustAsp) |                                                                                                                  |
| Aline Wash Buffer   | Conditioning                                        | No                   | Yes                          | Prevents percolating which results in hanging droplets                                                           |
|                     | Pod stays with in wells when wash buffer is removed | No                   | Yes                          |                                                                                                                  |
| Ethanol Wash        | Change tips between washes                          | No                   | Yes                          |                                                                                                                  |
|                     | Pod stays with in wells when wash buffer is removed | No                   | Yes                          |                                                                                                                  |
| Elution             | Mixing                                              | 5-point X10=50 times | 25 times                     |                                                                                                                  |
|                     | Aspirate to transfer to destination                 | Static               | Moving                       |                                                                                                                  |
|                     | Dispense to destination                             | Static               | Moving                       |                                                                                                                  |
| All steps           | Slower later pod movement                           | No                   | Yes                          |                                                                                                                  |
|                     | Dispense of waste with trailing air gap             | No                   | Waste                        | Trailing air gap reduces possible hanging waste droplets                                                         |
|                     | Disposal of tips                                    | Vibration            | waste Chute                  | No vibration means less possible aerosols                                                                        |

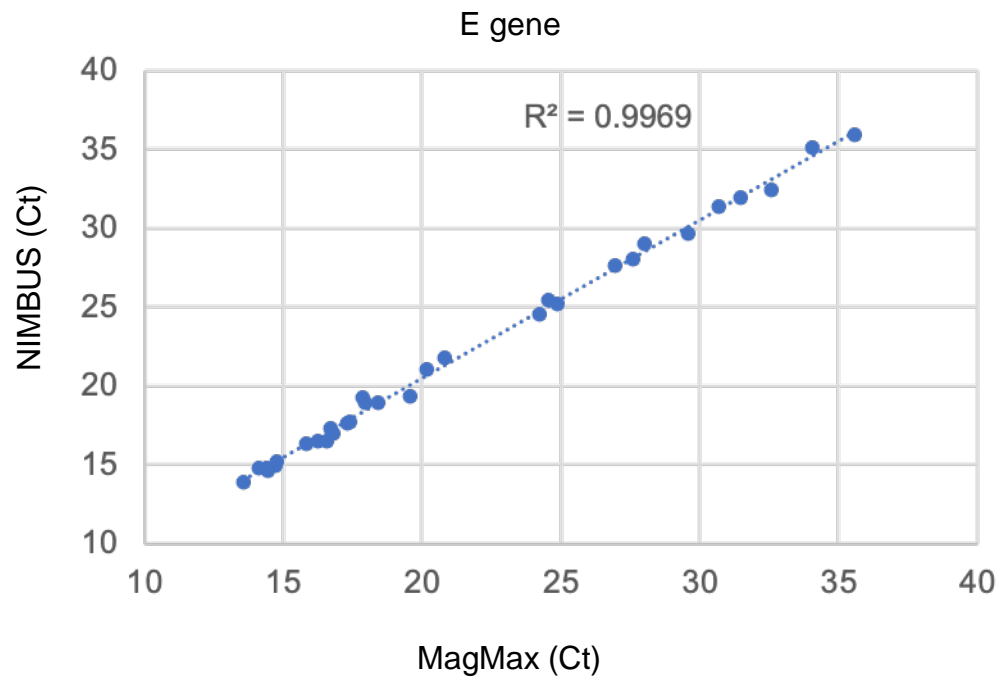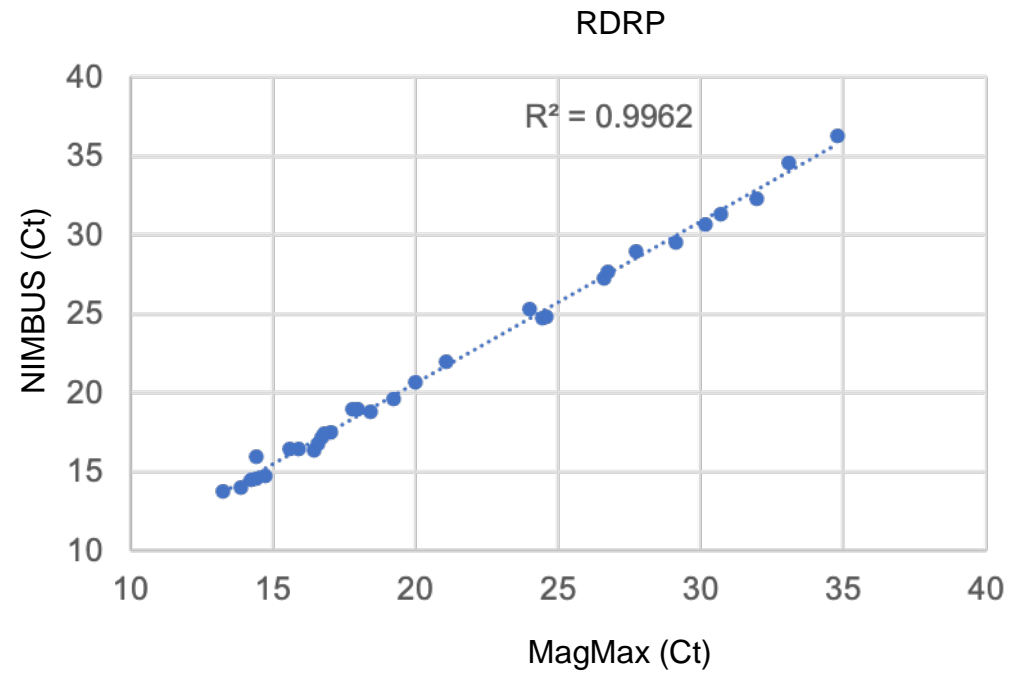

Supplement: Supplementary file [file media-2.pdf]
